# Supplementary material for: Single-molecule visualization of fast polymerase turnover in the bacterial replisome
Source: eLife journal article supplement (doi:10.7554/elife.23932), 2017-04-22
Supplement: supp [file elife_poa_e23932_Source_code_for_In_vitro_single_molecule_rolling_circle_DNA_replication_analysis_2.docx]

//This ImageJ macro will transform a movie of a moving replisome such that the replisomal spot remains stationairy.

//It uses positions C2 generated by Interp_Imagej_line.

imageTitles = newArray(nImages);

for (i = 0; i < nImages; i++) {

selectImage(i + 1);

imageTitles[i] = getTitle();

}

Dialog.create("Stack transform");

Dialog.addChoice("image_1 (used for correction)", imageTitles, imageTitles[0]);

Dialog.show();

original = Dialog.getChoice();

setBatchMode(true);

for (i = 1; i < nResults; i++) {

// correct for drift

selectImage(original);

setSlice(i + 1);

dx = (getResult("C2",i));

dy = 0; //-getResult("C2",i);

run("Translate...", "x=" + dx + " y=" + dy + " interpolation=Bilinear slice");

}

setBatchMode(false);
